# Supplementary material for: Construction and Characterization of T7 Bacteriophages Harboring Apidaecin-Derived Sequences
Source: MDPI journal article supplement (doi:10.3390/cimb44060174), 2022-06-01
Supplement: s1 [file s1]

## Supplementary material

### Construction and characterization of T7 bacteriophages harboring apidaecin-derived sequences

Tobias Ludwig, Ralf Hoffmann, and Andor Krizsan

Institute of Bioanalytical Chemistry, Faculty of Chemistry and Mineralogy, and Center for Biotechnology and Biomedicine, Universität Leipzig, Leipzig, 04103, Germany

#### Content

|                                                                                                      |    |
|------------------------------------------------------------------------------------------------------|----|
| File S1: Material and Chemicals - Reagents.....                                                      | S2 |
| Table S1: Bacterial and phage strains, plasmids, and primers .....                                   | S3 |
| Figure S1: Expression of sfGFP-apidaecin constructs and growth-related effects .....                 | S4 |
| Figure S2: Expression of apidaecins and growth-related effects.....                                  | S5 |
| Figure S3: Isolation and Growth of T7Select phage-resistant <i>E. coli</i> Rosetta strain R2.3 ..... | S6 |
| Figure S4: Mixed Culture Liquid Assay in 25% MHB and 100% LB medium.....                             | S7 |

## File S1: Materials and Chemicals

Reagents were obtained from the following companies unless stated otherwise: AppliChem GmbH (Darmstadt, Germany): Ethidium bromide solution (1%) and tris(hydroxymethyl)aminomethane (Tris); Biosolve BV (Valkenswaard, Netherlands): Acetonitrile (HPLC-S gradient grade) and dimethylformamide (DMF, peptide synthesis grade); Bio-Rad Laboratories GmbH (Munich, Germany): Precision Plus Protein™ Dual Xtra protein standard; Carl Roth GmbH, Karlsruhe, Germany): Agar-Agar Kobe I, IPTG (≥99%), kanamycin, lysogeny broth (LB) Miller, lysozyme (≥45 000 FIP U/mg), magnesium chloride (≥99%), phosphate buffered saline (PBS, pH 7.4), potassium chloride (≥99%), potassium dihydrogen phosphate (≥99%), sodium dodecyl sulfate (SDS, >99.5%), sodium hydroxide (≥98%), and trichloroacetic acid (≥99%); Greiner Bio-One GmbH (Frickenhausen, Germany): 96-Well microtiter plates; Honeywell Fluka™ (Seelze, Germany): Ammonium chloride (≥99.8%), calcium chloride (≥ 99.5 %), and magnesium chloride (≥99%); Iris Biotech (Marktredwitz, Germany): Leucin-Wang resin; Merck KGaA (Darmstadt, Germany): Diethyl ether (puriss); MultiSynTech GmbH: 4-Benzyloxybenzyl alcohol (Wang) resin; Orpegen Pharma GmbH (Heidelberg, Germany) or MultiSynTech GmbH (Witten, Germany) or Iris Biotech: All 9-fluorenylmethoxycarbonyl- (Fmoc ) protected amino acids; New England Biolabs (Ipswich, U.S.A.): restriction enzymes EcoRI, BglII, and HindIII and T4 ligase; Phenomenex Inc. (Torrance, CA, USA): Jupiter C<sub>18</sub>-columns (internal diameter (ID): 21.2 mm, length: 250 mm, particle size: 15 µm, pore size: 30 nm; ID: 10 mm, length: 250 mm, particle size: 5 µm, pore size: 30 nm; ID: 2 mm, length: 150 mm, particle size: 5 µm, pore size: 30 nm); SERVA electrophoresis GmbH (Heidelberg, Germany): Acrylamide/bisacrylamide (30% T, 2.67% C), agarose, ammonium persulfate (99%), Coomassie brilliant blue G250, glycine (98.5-101%), protease inhibitor mix, N,N,N',N'-tetramethylethylenediamin (TEMED), Tween® 20 (pure), and trypsin (sequencing grade, MS approved); Sigma-Aldrich GmbH (Taufkirchen, Germany): m-Cresol (99%), N,N-diisopropylcarbodiimide (DIC, >98% by GC), disodium hydrogen phosphate × 12 H<sub>2</sub>O (≥99%), 1,2-ethanedithiole (≥98%), 1-hydroxy-benzotriazole (HOBt, >98%), magnesium sulfate (>97%), 2-mercaptoethanol (≥ 99%), Müller Hinton broth II (MHBII), potassium chloride (>99%), potassium phosphate (≥ 99 %), sodium acetate (>99%), sodium chloride (≥99.5%), thioanisole (≥99%), trifluoroacetic acid (TFA, UV-grade for HPLC), TFA (purum) for peptide synthesis, and tris(hydroxymethyl)aminomethane (tris) acetate EDTA buffer (10x, TAE); Thermo Scientific GmbH (Schwerte, Germany): DNase I (RNase-free, 1 U/µL), dNTP Mix (2 mmol/L each) and Phusion High-Fidelity DNA Polymerase (2U/µL); VWR (Dresden, Germany): Chloroform (≥99%).

Table S1: List of all bacterial and phage strains, plasmids, and primers used in the current study.

|                               | Genotype/Sequence                                                                                                                                                                                                                     | Reference        |
|-------------------------------|---------------------------------------------------------------------------------------------------------------------------------------------------------------------------------------------------------------------------------------|------------------|
| <b>Bacterial Strain</b>       |                                                                                                                                                                                                                                       |                  |
| <i>E. coli</i> DH5α           | F <sup>-</sup> <i>endA1 glnV44 thi-1 recA1 relA1 gyrA96 deoR nupG purB20</i> φ80d/ <i>lacZ</i> ΔM15 Δ( <i>lacZ</i> YA- <i>argF</i> )U169, <i>hsdR17</i> ( <i>r<sub>K</sub><sup>-</sup>m<sub>K</sub><sup>+</sup></i> ), λ <sup>-</sup> | Invitrogen       |
| <i>E. coli</i> Rosetta™ pLysS | F <sup>-</sup> <i>ompT gal dcm lon?</i> <i>hsdS<sub>B</sub></i> ( <i>r<sub>B</sub><sup>-</sup>m<sub>B</sub><sup>-</sup></i> ) λ(DE3) [ <i>malB</i> <sup>+</sup> ] <sub>K-12</sub> (λ <sup>S</sup> ) pLysSRARE(Cm <sup>R</sup> )       | Merck            |
| <i>E. coli</i> Rosetta R2.3   | + pGFP / T7Select™ 415 resistant                                                                                                                                                                                                      | This publication |
| <b>Phage Strain</b>           |                                                                                                                                                                                                                                       |                  |
| T7Select™ 415                 | T7 Δgp0.3-07, Δgp3.8, gp10B+MCS                                                                                                                                                                                                       | Merck            |
| T7Select_sfGFP                | + Biotin s1.3 sfGFP                                                                                                                                                                                                                   |                  |
| T7Select_sfGFP-Api801         | + Biotin s1.3 sfGFP-Api801                                                                                                                                                                                                            |                  |
| T7Select_sfGFP-Api805         | + Biotin s1.3 sfGFP-Api805                                                                                                                                                                                                            |                  |
| T7Select_Api802               | + Biotin s1.3 Api802                                                                                                                                                                                                                  | This publication |
| T7Select_Api806               | + Biotin s1.3 Api806                                                                                                                                                                                                                  |                  |
| T7Select_Api810               | + Biotin s1.3 Api810                                                                                                                                                                                                                  |                  |
| <b>Plasmid</b>                |                                                                                                                                                                                                                                       |                  |
| pGFP                          | pET Biotin 6xHis GFP Kan <sup>R</sup>                                                                                                                                                                                                 | Addgene          |
| pET28a <sup>+</sup>           | High copy number, pBR322-derived expression plasmid (5.369 kb), 6xHis-tag and T7 promoter, induction by IPTG, Kan <sup>R</sup>                                                                                                        | Novagen          |
| psfGFP                        | pET28a <sup>+</sup> Biotin s1.3 sfGFP                                                                                                                                                                                                 |                  |
| psfGFP-Api801                 | pET28a <sup>+</sup> Biotin s1.3 sfGFP-Api801                                                                                                                                                                                          |                  |
| psfGFP-Api805                 | pET28a <sup>+</sup> Biotin s1.3 sfGFP-Api805                                                                                                                                                                                          |                  |
| pApi802-sfGFP                 | pET28a <sup>+</sup> Biotin s1.3 Api802-sfGFP                                                                                                                                                                                          | This publication |
| pApi802                       | pET28a <sup>+</sup> Biotin s1.3 Api802                                                                                                                                                                                                |                  |
| pApi806                       | pET28a <sup>+</sup> Biotin s1.3 Api806                                                                                                                                                                                                |                  |
| pApi810                       | pET28a <sup>+</sup> Biotin s1.3 Api810                                                                                                                                                                                                |                  |
| <b>Primer</b>                 |                                                                                                                                                                                                                                       |                  |
| pET28 fwd                     | TTATGCTAGTTATTGCTCAGCGG                                                                                                                                                                                                               |                  |
| pET28 rev                     | GGAGCTGTCGTATTCCAGTC                                                                                                                                                                                                                  |                  |
| T7 fwd                        | GGAGCTGTCGTATTCCAGTC                                                                                                                                                                                                                  |                  |
| T7 rev                        | AACCCCTCAAGACCCGTTTA                                                                                                                                                                                                                  | This publication |

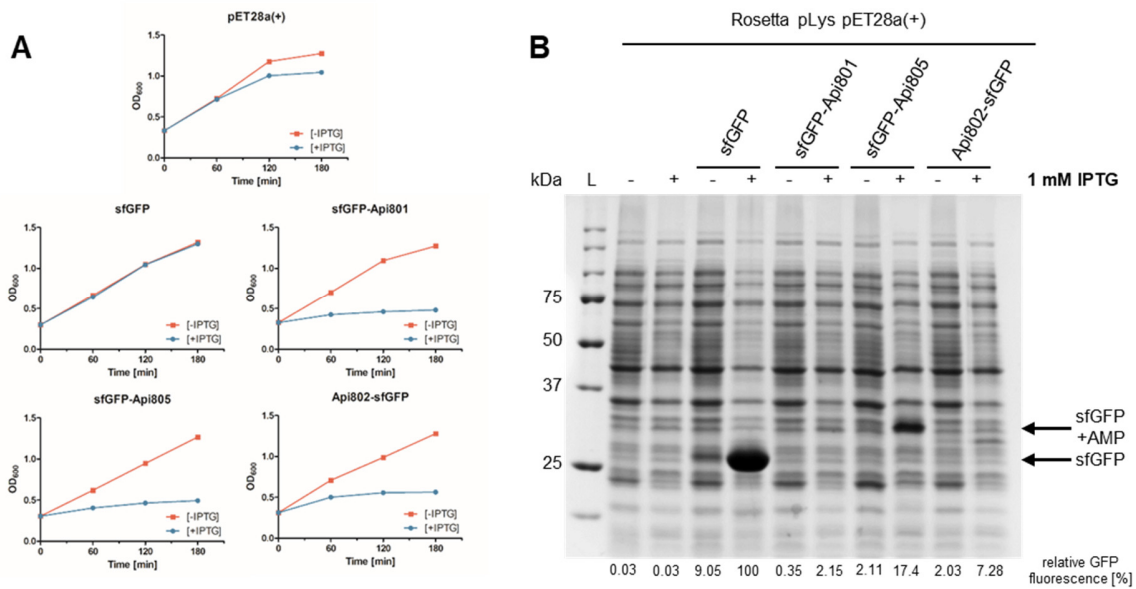

**Figure S1.** Expression of sfGFP, both sfGFP-Api801/805 constructs, and the Api802-sfGFP construct in *E. coli* Rosetta pLysS. **A** Comparison of growth-related effects after IPTG-induced expression of the indicated constructs using the OD<sub>600</sub> values of the cell culture. *E. coli* culture growth rates monitored by OD<sub>600</sub> values without (red) or with (blue) inducing peptide expression by IPTG. **B** SDS-PAGE of the corresponding *E. coli* lysate protein preparations. The relative fluorescence intensities of the corresponding *E. coli* cultures are indicated at the bottom of each lane.

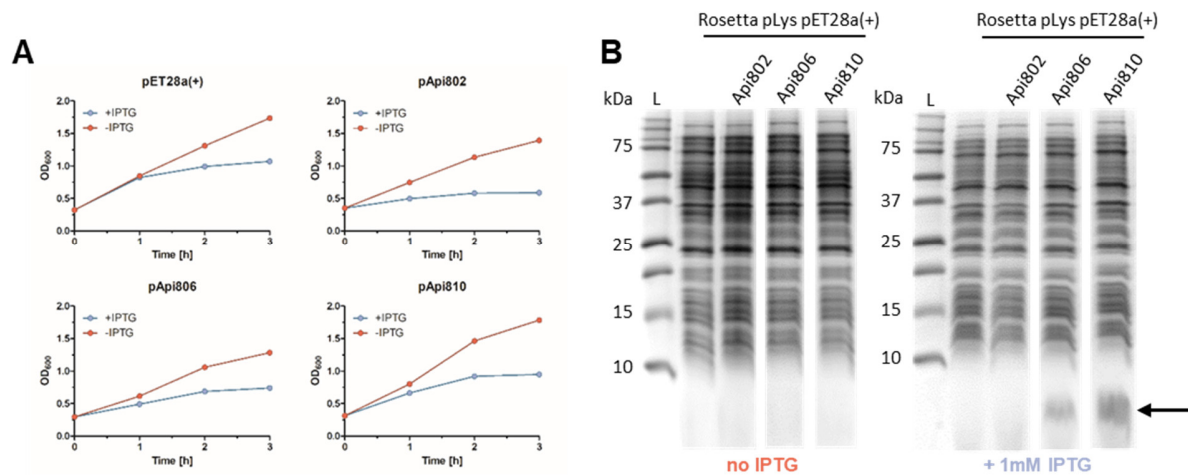

**Figure S2.** Bacterial growth rates and protein expression in *E. coli* Rosetta harboring an empty pET28a+ vector or pET28a+ vectors containing Api802, Api806 and Api810 sequences. **A** *E. coli* culture growth rates monitored by OD<sub>600</sub> values without (red) or with (blue) inducing peptide expression by IPTG. **B** SDS-PAGE of lysates prepared from *E. coli* cells after IPTG induction. The black arrow indicates the region where Api802, Api806, and Api810 should migrate, based on free peptides.

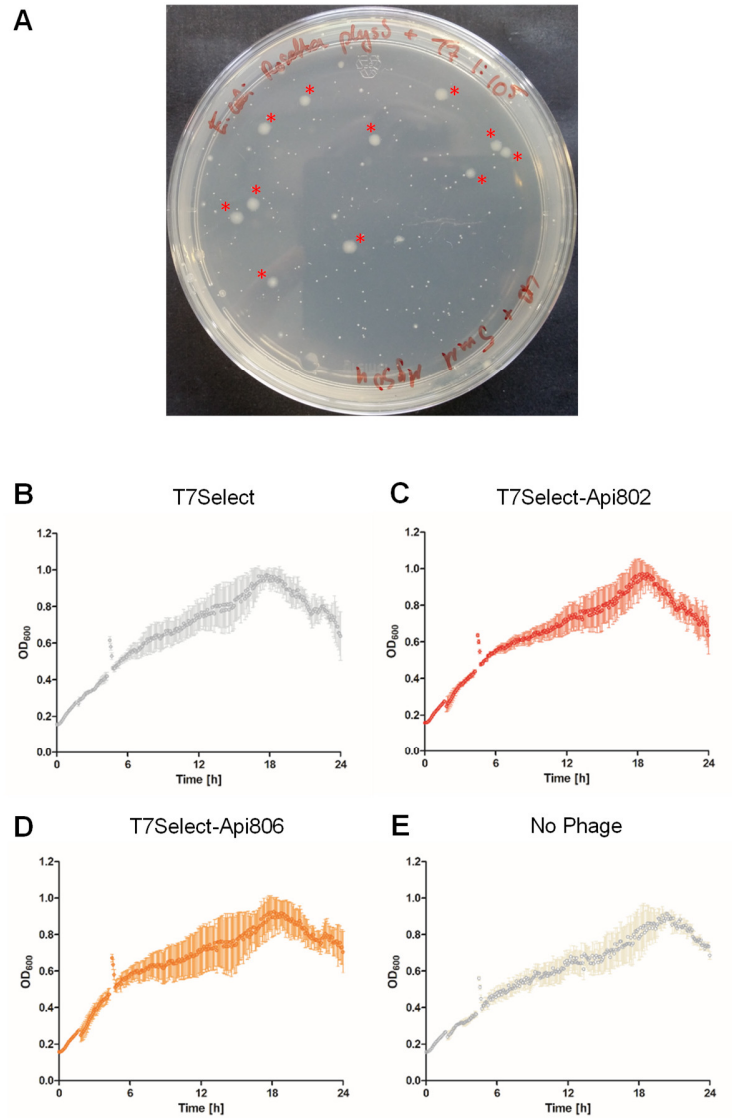

**Figure S3** Isolation of phage-insensitive *E. coli* Rosetta strains. Picking of big colonies (\*) of phage-insensitive strains after plaque assay with a T7Select phage titer of  $\sim 3 \times 10^5$  PFU/mL (**A**). Growth of the isolated T7Select phage-resistant *E. coli* Rosetta strain R2.3 infected with T7Select (**B**, gray) and engineered phages carrying Api802 (**C**, red) or Api806 (**D**, orange) inserts (MOI 0.01) or without phages (**E**, light grey). Bacterial growth was monitored by OD<sub>600</sub> values recorded every 5 min for 24 h. **B-E** Experiments were done twice with six replicates. Error bars show the standard deviation of all six replicates of one representative experiment.

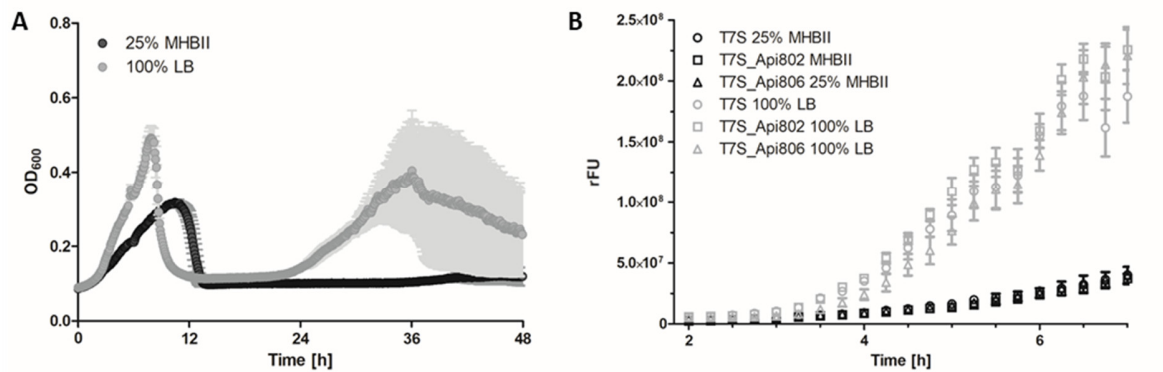

**Figure S4.** Lysis kinetics and protein expression are depend on the used medium. **A** Comparison of T7Select mediated lysis of *E. coli* Rosetta pLysS in 25% MHB (black) and 100% LB medium (grey). In 25% MHBII the bacterial culture does not grow as high as in 100% LB medium prior to lysis. The lysis in 25% MHBII is also delayed by roughly 2 hours. The reduced and slow growth in combination with the late lysis indicate a reduced metabolic activity of the bacteria grown in diluted MHBII. Therefore, we expected even lower expression rates of the phage integrated peptides. Additionally, there seems to be no regrowth in the minimal medium, which would have left us incapable of measuring the peptide effect on emerging phage resistant bacteria after lysis. **B** Comparison of the GFP fluorescence measured in Mixed Culture Liquid Assay in 25% MHBII and 100% LB medium. GFP expression levels in 25% MHBII are roughly 4-5 fold lower compared to those in 100% LB medium. Differences between wildtype and AMP-phages phages cannot be observed in any of the media. Experiments were done once with ten replicates. Error bars show the standard deviation of all ten replicates.
